# Supplementary material for: Synthesis of Carbon Quantum Dot Nanoparticles Derived from Byproducts in Bio-Refinery Process for Cell Imaging and In Vivo Bioimaging
Source: MDPI journal article supplement (doi:10.3390/nano9030387), 2019-03-07
Supplement: s1 [file s1]

# Synthesis of carbon quantum dot nanoparticles derived from byproducts in bio-refinery process for cell imaging and in-vivo bioimaging

Caoxing Huang <sup>1#</sup>, Huiling Dong <sup>2#</sup>, Yan Su <sup>1</sup>, Yan Wu<sup>2</sup>, Robert Narron<sup>3</sup>, and Qiang Yong <sup>1,\*</sup>

<sup>1</sup> Co-Innovation Center for Efficient Processing and Utilization of Forest Products, College of Chemical Engineering, Nanjing Forestry University, Nanjing 210037, hcx@njfu.edu.cn (C.H.); suyan1994@njfu.edu.cn (Y.S.);

<sup>2</sup> College of Furnishings and Industrial Design, Nanjing Forestry University, Longpan Road 159, Nanjing 210037, China, ll233d@163.com (H.D.); wuyan@njfu.edu.cn (Y.W.);

<sup>3</sup> Department of Forest Biomaterials, North Carolina State University, Campus Box 8005, Raleigh, NC 27695-8005 USA, robnarron@gmail.com (R.N.)

\* Correspondence: swhx@njfu.com.cn (Q.Y.); Tel.: +86 25 85427797

# Huiling Dong contributed equally to this work, regarding as the first author.

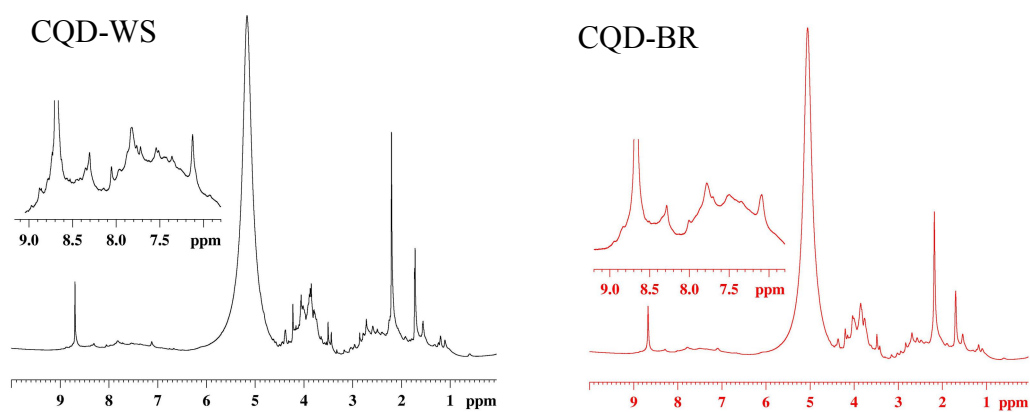

Fig. S1  $^1\text{H}$  NMR spectra of CQD-WS and CQD-BR

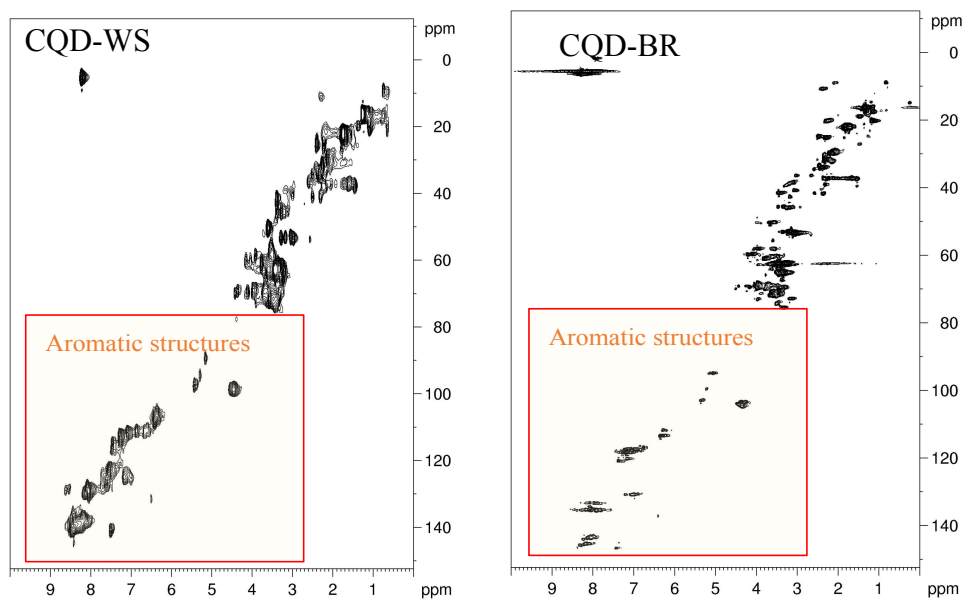

Fig. S2 2D-HSQC spectra of CQD-WS and CQD-BR

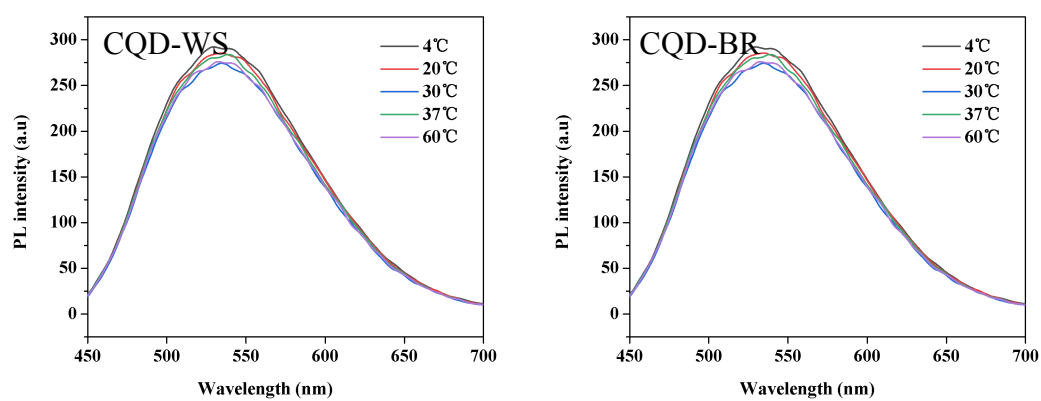

Fig. S3 the fluorescent behavior of the CQD-WS and CQD-BR observed at 4-60 °C

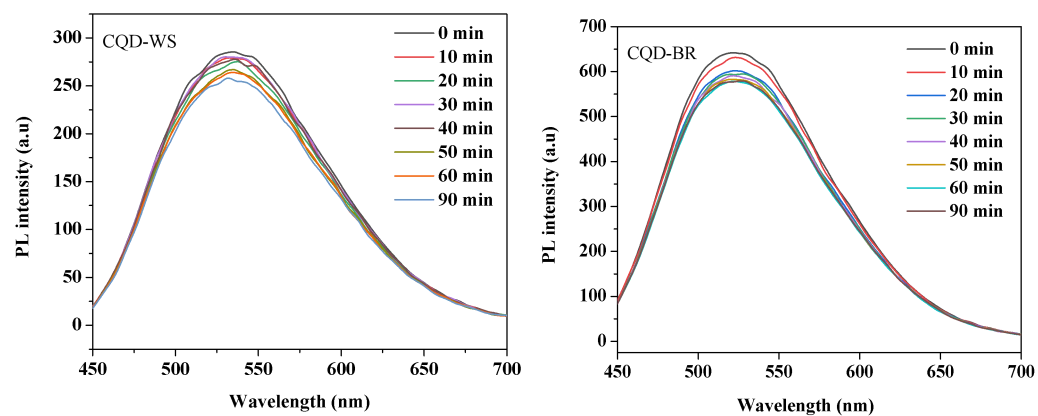

Fig. S4 Fluorescence intensity of CQD-WS and CQD-BR upon irradiation with UV light at 365 nm ( $0.1 \text{ mW cm}^{-2}$ ) in aqueous solution
